# Supplementary material for: Conservation gaps for the orchid Rhynchostele rossii: an integration of IUCN evaluation and ensemble species distribution models
Source: Research Square preprint supplement (doi:10.21203/rs.3.rs-6559337/v1), 2025-05-15
Supplement: Supplementary file 1 [file 674292840548ede3aac647ed.docx]

Supplementary Table 1. Ecoregions and distribution areas of *Rhynchostele* *rossii* after adjusting the binary distribution model using the forest quality map.

| **Ecoregion** | **Area (km2)** |
| --- | --- |
| Central American Pine-Oak Forests | 22,939 |
| Sierra Madre Del Sur Pine-Oak Forests | 12,601 |
| Trans-Mexican Volcanic Belt Pine-Oak Forests | 12,077 |
| Oaxacan Montane Forests | 8,343 |
| Central American Montane Forests | 8,273 |
| Sierra Madre De Oaxaca Pine-Oak Forests | 6,822 |
| Veracruz Moist Forests | 6,305 |
| Veracruz Montane Forests | 5,552 |
| Petén-Veracruz Moist Forests | 5,439 |
| Sierra Madre De Chiapas Moist Forests | 4,009 |
| Sierra Madre Oriental Pine-Oak Forests | 2,958 |
| Southern Pacific Dry Forests | 765 |
| Meseta Central Matorral | 308 |
| Balsas Dry Forests | 111 |

Supplementary Table 2. Potential distribution area (km2) in the naturally protected regions, location (country and state), their remaining area after cropping by forest quality (km2), and percentage of area loss.

| **Protected natural area** | **Location** | **Potential area** | **Actual area** | **% loss** |
| --- | --- | --- | --- | --- |
| El Triunfo | MX-CHP | 1263 | 1046 | 17% |
| Sierra Gorda | MX-QUE | 1190 | 613 | 48% |
| Sierra de las Minas | GT-ZA | 1167 | 1064 | 9% |
| Cuenca del Lago Atitlán | GT-SO; GT-QC; GT-CM; GT-SU; GT-TO | 1081 | 494 | 54% |
| Z.P.F. en los terrenos que se encuentran en los mpios. de La Concordia, Ángel Albino Corzo, Villa Flores y Jiquipilas | MX-CHP | 761 | 679 | 11% |
| Z.P.F.T.C.C. de los ríos Valle de Bravo, Malacatepec, Tilostoc y Temascaltepec | MX-MEX | 601 | 317 | 47% |
| Z.P.F.V. la Cuenca Hidrográfica del Río Necaxa | MX-PUE | 509 | 223 | 56% |
| La Sepultura | MX-CHP | 505 | 452 | 10% |
| Pico El Loro-Paxtal | MX-CHP | 501 | 407 | 19% |
| Nevado de Toluca | MX-MEX | 491 | 224 | 54% |
| Zempoala - La Bufa Otomí-Mexica | MX-MEX | 404 | 188 | 53% |
| El Cielo | MX-TAM | 343 | 292 | 15% |
| Corredor Biológico Chichinautzin | MX-MOR | 336 | 186 | 45% |
| Apaneca-Ilamatepec | SV-SO | 315 | 278 | 12% |
| Pico de Tancítaro | MX-MIC | 244 | 178 | 27% |
| Pico de Orizaba | MX-PUE; MX-VER | 241 | 12 | 95% |
| Metlac-Rí­o Blanco | MX-VER | 231 | 158 | 32% |
| Cañón del Río Blanco | MX-VER | 230 | 123 | 47% |
| Celaque | HN-LE | 227 | 204 | 10% |
| Ixil Visis-Cabá | GT-QC | 226 | 184 | 19% |
| Tehuacán-Cuicatlán | MX-OAX;MX-PUE | 206 | 130 | 37% |
| Montecillos | HN-CM | 202 | 150 | 26% |
| Opalaca | HN-IN | 202 | 167 | 17% |
| Iztaccí­huatl-Popocatépetl | MX-MEX; MX-PUE; MX-MOR | 197 | 12 | 94% |
| C.A.D.N.R. 043 Estado de Nayarit | MX-NAY; MX-DUR; MX-JAL; MX-ZAC | 173 | 171 | 1% |
| Los Mármoles | MX-HID | 170 | 97 | 43% |
| Pico Bonito | HN-AT | 169 | 118 | 30% |
| Volcán Tacaná | GT-SM; MX-CHP | 163 | 109 | 33% |
| Güisayote | HN-OC | 155 | 83 | 46% |
| Trifinio-Fraternidad | SV-SA | 149 | 97 | 35% |
| Los Altos de San Miguel Totonicapán | GT-TO | 146 | 98 | 33% |
| Nahuatlaca - Matlazinca | MX-MEX | 145 | 73 | 50% |
| El Jilguero | HN-LP | 144 | 100 | 31% |
| Volcán Tajumulco | GT-SM | 139 | 76 | 45% |
| Trifinio | GT-CQ | 137 | 93 | 32% |
| El Tepozteco | MX-MOR | 136 | 77 | 43% |
| Cofre de Perote o Nauhcampatépetl | MX-VER | 124 | 34 | 73% |
| Montaña de Comayagua | HN-CM | 120 | 97 | 19% |
| Volcán Pacayita | HN-LE | 119 | 65 | 45% |
| Barranca de Metztitlán | MX-HID | 117 | 11 | 91% |
| Tenancingo - Malinalco - Zumpahuacan | MX-MEX | 116 | 53 | 54% |
| Trifinio Fraternidad |  | 95 | 62 | 35% |
| Río Filo-Bobos y su Entorno | MX-VER | 93 | 60 | 35% |
| Santuario del Agua y Forestal Manantial El Salto de Atlautla - Ecatzingo | MX-MEX | 92 | 62 | 33% |
| K'ojlab'l Tze´ te Tnom Todos Santos Cuchumatán | GT-HU | 87 | 30 | 66% |
| Selva El Ocote | MX-CHP | 84 | 49 | 42% |
| Montecristo Trifinio | HN-OC | 82 | 54 | 34% |
| Volcán Fuego | GT-ES | 80 | 42 | 48% |
| Maya Mountain | BZ-SC | 78 | 38 | 51% |
| La Goleta | MX-MX | 78 | 60 | 23% |
| Mixcure | HN-IN | 74 | 68 | 8% |
| Archipiélago de Bosques y Selvas de la Región Capital del Estado de Veracruz | MX-VER | 73 | 37 | 49% |
| Guajiquiro | HN-LP | 69 | 45 | 35% |
| Mariposa Monarca | MX-MIC; MX-MEX | 67 | 50 | 25% |
| Sierra de Otontepec | MX-VER | 66 | 55 | 17% |
| Santa María Guienagati | MX-OAX | 66 | 65 | 2% |
| Quetzaltenango - Saqbé | GT-QZ | 64 | 33 | 48% |
| Volcán Agua | GT-ES; GT-SA | 64 | 44 | 31% |
| Área de Conservación San Pedro Tlatepusco | MX-OAX | 62 | 56 | 10% |
| Santa Bárbara | HN-SB | 58 | 53 | 9% |
| Mesas de Miraflor Moropotente | NI-ES | 57 | 21 | 63% |
| Lagunas de Zempoala | MX-MOR | 55 | 41 | 25% |
| Volcán Santo Tomás | GT-SO; GT-QZ; GT-SU | 53 | 40 | 25% |
| La Tierra del Faisán | MX-OAX | 53 | 43 | 19% |
| La Montaña Malinche o Matlalcuéyatl | MX-TLA | 52 | 32 | 38% |
| Reserva de Biosfera Bosawas | NI-JI-CN | 52 | 34 | 35% |
| Chanal | MX-CHP | 51 | 16 | 69% |
| Sittee River | BZ-SC | 51 | 26 | 49% |
| Erapuca | HN-OC | 51 | 38 | 25% |
| Volcán Zunil | GT-QZ; GT-SO | 50 | 31 | 38% |
| Área de Conservación Nopalera del Rosario | MX-OAX | 49 | 36 | 27% |
| Volcán Lacandón | GT-QZ | 44 | 33 | 25% |
| Santuario del Agua y Forestal Subcuenca Tributaria Río Mayorazgo-Temoaya | MX-MEX | 44 | 44 | 0% |
| Milpa Alta | MX-CMX | 43 | 18 | 58% |
| Montaña de Yoro | HN-FM | 42 | 26 | 38% |
| Parque Regional municipal El Mirador Rey Tepepul | GT-SO | 42 | 30 | 29% |
| Cañón del Sumidero | MX-CHP | 40 | 19 | 53% |
| Rancho Nuevo | MX-CHP | 40 | 32 | 20% |
| Área de Conservación San Felipe de León | MX-OAX | 40 | 33 | 18% |
| Cerro Azul | HN-CP | 40 | 37 | 8% |
| Volcán Acatenango | GT-CM; GT-SA | 39 | 22 | 44% |
| Columbia River | BZ-TOL | 38 | 15 | 61% |
| Área de Conservación Ecológica de San Vicente Zoyatlán | MX-GRO | 38 | 24 | 37% |
| Yerba Buena | HN-FM | 38 | 24 | 37% |
| Zona de Reserva Ecológica Comunal de San Juan Teponaxtla | MX-OAX | 38 | 35 | 8% |
| La Unión | GT-ZA | 37 | 33 | 11% |
| Santuario del Agua y Forestal Manantiales Cascada Diamantes | MX-MEX | 37 | 35 | 5% |
| Área de Conservación Ecológica de Acatepec | MX-GRO | 36 | 17 | 53% |
| Macizos de Peñas Blancas | NI-JI | 36 | 28 | 22% |
| Cerro Quiabuc - Las Brisas | NI-ES | 35 | 26 | 26% |
| Ahuacatlán | MX-MX | 34 | 31 | 9% |
| Volcán Siete Orejas | GT-QZ | 33 | 19 | 42% |
| Sabanetas | HN-LP | 31 | 21 | 32% |
| El Pital | HN-OC | 30 | 17 | 43% |
| Cockscomb Basin | BZ-SC/BZ-TOL | 30 | 19 | 37% |
| Cerro Dataní­ - El Diablo | NI-JI | 29 | 28 | 3% |
| Cordillera Alux | GT-GU | 29 | 28 | 3% |
| ANP Cerro de los Manantiales | MX-GRO | 28 | 16 | 43% |
| San Miguel Topilejo | MX-CMX | 28 | 25 | 11% |
| Luisiana | GT-BV | 27 | 20 | 26% |
| Fila Cerro Frío - La Cumplida | NI-MT | 27 | 24 | 11% |
| Cerro Tisey - Estanzuela | NI-ES | 26 | 15 | 42% |
| Covirey | GT-HU | 26 | 24 | 8% |
| Agalta | HN-OL | 25 | 11 | 56% |
| Azul Meámbar | HN-CM | 25 | 14 | 44% |
| Área de Conservación Ecológica de Zitlaltepec | MX-GRO | 25 | 19 | 24% |
| Parque Nacional Cañón del Sumidero | MX-CHP | 24 | 7 | 71% |
| Ona | GT-SM | 23 | 19 | 17% |
| Patuca | HN-OL | 22 | 8 | 64% |
| Texiguat | HN-AT | 22 | 10 | 55% |
| Astillero Municipal Esquipulas Palo Gordo | GT-SM | 22 | 14 | 36% |
| Zunil | GT-QZ | 22 | 16 | 27% |
| Las Nubes | GT-CM | 21 | 15 | 29% |
| Área de Conservación Santiago Tlatepusco | MX-OAX | 21 | 20 | 5% |
| Montaña Verde | HN-IN | 20 | 18 | 10% |
| Sierra de Tamaulipas | MX-TAM | 19 | 10 | 47% |
| Pico Pijol | HN-YO | 19 | 12 | 37% |
| Lago de Yojoa | HN-SB | 19 | 15 | 21% |
| Los Volcanes | SV-SA | 18 | 10 | 44% |
| Concepción | GT-BV | 18 | 11 | 39% |
| Lote 8 | GT-IZ | 18 | 16 | 11% |
| Parque Nacional Montecristo | SV-SA | 18 | 16 | 11% |
| Astillero Municipal de Tecpán | GT-CM | 17 | 13 | 24% |
| Área de Conservación Cerro Mirador | MX-OAX | 17 | 15 | 12% |
| Danii Idoo (Cerro Iglesia) | MX-OAX | 17 | 17 | 0% |
| Mayflower Bocawina | BZ-SC | 16 | 5 | 69% |
| Cerro Ayaqueme-Volcán Huehuel | MX-MX | 16 | 7 | 56% |
| Volcán Santa María | GT-QZ | 16 | 7 | 56% |
| Volcán Santiaguito | GT-QZ | 16 | 7 | 56% |
| Bladen | BZ-TOL | 16 | 8 | 50% |
| Concepción Chiquirichapa | GT-QZ | 16 | 8 | 50% |
| Lote 10 | GT-IZ | 16 | 14 | 13% |
| Cerro Apante | NI-MT | 16 | 15 | 6% |
| Sistema de Represas y Corredores biológicos de la Cuenca Hidrográfica del Río Necaxa | MX-PUE | 15 | 3 | 80% |
| Volcán Nevado de Colima | MX-COL; MX-JAL | 15 | 3 | 80% |
| San Miguel Ajusco | MX-CMX | 15 | 5 | 67% |
| Cerro Saslaya | NI-JI | 15 | 6 | 60% |
| Desierto de los Leones | MX-DIF | 15 | 14 | 7% |
| Área de Conservación Ecológica de Huehuetepec | MX-GRO | 14 | 4 | 71% |
| Honey Camp | BZ-CZL/BZ-OW | 14 | 4 | 71% |
| Volcán Pacaya | GT-GU | 14 | 4 | 71% |
| Volcán de Pacaya y Laguna de Calderas | GT-GU | 14 | 6 | 57% |
| Atzingo | MX-MEX | 14 | 11 | 21% |
| Lote "9" | GT-ZA | 14 | 11 | 21% |
| Cuencas y corales de la zona costera de Huatulco | MX-OAX | 14 | 14 | 0% |
| El Pital | SV-CH | 13 | 8 | 38% |
| San Sebastián | GT-SA | 13 | 8 | 38% |
| Congolón, Piedra Parada y Coyocutena | HN-LE | 13 | 9 | 31% |
| Área de Conservación San Antonio del Barrio | MX-OAX | 13 | 11 | 15% |
| K'antÍ­ Shul | GT-AV | 13 | 12 | 8% |
| Área de Conservación Ecológica de San Lucas Teocuitlapa | MX-GRO | 12 | 6 | 50% |
| Volcán Chicabal | GT-QZ | 12 | 7 | 42% |
| Área de Conservación San Antonio Analco | MX-OAX | 12 | 9 | 25% |
| Zonas de Conservación Comunitaria Santo Domingo Cacalotepec | MX-OAX | 12 | 9 | 25% |
| Cerro El Arenal | NI-MT | 12 | 10 | 17% |
| San Nicolás Totolapan | MX-CMX | 12 | 11 | 8% |
| Lote 6 | GT-IZ | 12 | 11 | 8% |
| Astillero Municipal Volcán de Acatenango | GT-CM | 11 | 5 | 55% |
| La Concordia Zaragoza | MX-CHP | 11 | 6 | 45% |
| Monte de Oro y anexos | GT-SO | 11 | 6 | 45% |
| Lote 11 | GT-ZA | 11 | 7 | 36% |
| La Pera | MX-CHP | 11 | 8 | 27% |
| Guiexoxa | MX-OAX | 11 | 9 | 18% |
| Área de Conservación Cañada del Iris | MX-GRO | 11 | 9 | 18% |
| Montaña Larga | GT-PR | 11 | 9 | 18% |
| Astillero Municipal de San Marcos | GT-SM | 11 | 10 | 9% |
| Estación Científica Refugio del Quetzal - Volcán Atitlán | GT-SU | 11 | 10 | 9% |
| Milán y Anexos | GT-SO | 10 | 7 | 30% |
| Reserva Ejidal Vega del Sol | MX-OAX | 10 | 7 | 30% |
| Cerro La Cruz Tejaltepec | MX-MX | 10 | 8 | 20% |
| Dulce Nombre | GT-SR | 10 | 8 | 20% |
| El Bosque | GT-PR | 10 | 9 | 10% |
| Insurgente Miguel Hidalgo y Costilla | MX-DIF; MX-MEX | 10 | 10 | 0% |
| Mario Dary Rivera | GT-BV | 10 | 10 | 0% |
| Cerro Tomabú | NI-ES | 9 | 2 | 78% |
| Río Grande San Pedro | MX-MEX | 9 | 2 | 78% |
| Sibun | BZ-CY | 9 | 4 | 56% |
| Ozuma y Cuahuloma | MX-PUE | 9 | 6 | 33% |
| Australia | GT-SM | 9 | 7 | 22% |
| Volcán Tecuamburro | GT-SR | 9 | 7 | 22% |
| Cerro de Garnica | MX-MIC | 9 | 9 | 0% |
| Cerro Panan | GT-SO | 9 | 9 | 0% |
| Cerros de Yalí | NI-JI | 8 | 2 | 75% |
| Deep River | BZ-TOL | 8 | 2 | 75% |
| Hierve El Agua | MX-OAX | 8 | 3 | 63% |
| Medio Día | GT-SM | 8 | 3 | 63% |
| Benito Juárez | MX-OAX | 8 | 4 | 50% |
| Sibinal (Canjulá, Tacaná, Los Maijones y Tocapote) | GT-SM | 8 | 4 | 50% |
| El Campanario - Laacanloo Cruz | MX-OAX | 7 | 1 | 86% |
| Montes Azules | MX-CHP | 7 | 2 | 71% |
| La Cruz - Corral de Piedra | MX-OAX | 7 | 3 | 57% |
| Chinajux y Sechinaux | GT-AV | 7 | 3 | 57% |
| Los Andes | GT-SU | 7 | 3 | 57% |
| Cuevas de Mantetzulel | MX-SLP | 7 | 4 | 43% |
| Área de Conservación Ecológica de Colombia de Guadalupe | MX-GRO | 7 | 4 | 43% |
| Área de Conservación Ecológica Comunitaria Campo Verde | MX-GRO | 7 | 5 | 29% |
| Freshwater Creek | BZ-CZL/BZ-OW | 7 | 6 | 14% |
| Puca | HN-LE | 7 | 7 | 0% |
| Santa Rosalía | GT-ZA | 6 | 1 | 83% |
| Cumbres del Ajusco | MX-DIF | 6 | 1 | 83% |
| ANP Área de Conservación Ecológica Comunidad Paraje Montero | MX-GRO | 6 | 2 | 67% |
| Astillero Municipal 1 y 2 de San Pedro Sacatepequez San Marcos | GT-SM | 6 | 2 | 67% |
| El Zapote | GT-ES | 6 | 2 | 67% |
| Tetlalcolulco Lugar Sagrado Santa Isabel Chalma | MX-MEX | 6 | 2 | 67% |
| Los Tres Reyes | MX-MX | 6 | 3 | 50% |
| Joya Grande | GT-CM | 6 | 4 | 33% |
| San Juan del Monte | MX-VER | 6 | 4 | 33% |
| Bosque Mesófilo Nevado de Colima | MX-JAL | 6 | 5 | 17% |
| Cerro Verde | GT-BV | 6 | 5 | 17% |
| Los Tarrales | GT-SU | 6 | 6 | 0% |
| Tewancarnero | GT-SM | 6 | 6 | 0% |
| Laguna Madre y Delta del Río Bravo | MX-TAM | 5 | 0 | 100% |
| Área de Conservación Montenegro | MX-OAX | 5 | 3 | 40% |
| El Gavilán | MX-OAX | 5 | 3 | 40% |
| Cascadas de Texolo y su entorno | MX-VER | 5 | 3 | 40% |
| Bosencheve | MX-MIC; MX-MEX | 5 | 4 | 20% |
| Santa Isabel | GT-SR | 5 | 4 | 20% |
| Área de Conservación Paso Nuevo La Hamaca | MX-OAX | 4 | 1 | 75% |
| ANP Área de Conservación Ecológica de Malinaltepec | MX-GRO | 4 | 2 | 50% |
| El Vesubio | GT-SU | 4 | 2 | 50% |
| Volcán Cerro Quemado | GT-QZ | 4 | 2 | 50% |
| Volcán Jumay | GT-JA | 4 | 2 | 50% |
| Altas Cumbres | MX-TAM | 4 | 3 | 25% |
| Chelemha | GT-AV | 4 | 3 | 25% |
| Cumbres de Monterrey | MX-NLE | 4 | 3 | 25% |
| La Igualdad | GT-SM | 4 | 3 | 25% |
| Altamira | GT-SU | 4 | 4 | 0% |
| Las Nubes | MX-CHP | 4 | 4 | 0% |
| Reserva Ecológica Natural en la Cuenca Alta del Río Atoyac 1 Z-1 P1/1 | MX-VER | 4 | 4 | 0% |
| Finca Los Cedros | GT-SR | 3 | 0 | 100% |
| La Hoya de las Huahuas | MX-SLP | 3 | 0 | 100% |
| Área de Conservación del Faisán Real del Ejido Rancho Faisán | MX-OAX | 3 | 1 | 67% |
| La Muralla | HN-OL | 3 | 1 | 67% |
| Volcán de San Miguel | SV-SM | 3 | 1 | 67% |
| Yucul | NI-MT | 3 | 1 | 67% |
| Astillero Municipal San Cristóbal Cucho | GT-SM | 3 | 1 | 67% |
| Cerro Chuiraxamoló | GT-SO | 3 | 1 | 67% |
| Astillero Pajales, Astillero Chicorona, Astillero Grande y Astillero Pequeño | GT-CM | 3 | 2 | 33% |
| Cerro Colorado | Puebla | 3 | 2 | 33% |
| Finca La Gloria | GT-QC | 3 | 2 | 33% |
| Finca La Travesía | GT-SA | 3 | 2 | 33% |
| Los Hornos | GT-ZA | 3 | 2 | 33% |
| Montaña Aq'oma' | GT-HU | 3 | 2 | 33% |
| San Bernardino E.C.A. Xejuyu | GT-CM | 3 | 2 | 33% |
| Sierra Gorda de Guanajuato | MX-GUA | 3 | 2 | 33% |
| Volcán Moyuta | GT-JU | 3 | 2 | 33% |
| Astillero Municipal Ox'ijuy'u | GT-SA | 3 | 2 | 33% |
| Chicamole | MX-HID | 3 | 2 | 33% |
| El Bejucal | GT-SR | 3 | 2 | 33% |
| El Sótano de las Golondrinas | MX-SLP | 3 | 2 | 33% |
| Hermenegildo Galeana | MX-MEX | 3 | 2 | 33% |
| Laguna de Alegría | SV-US | 3 | 2 | 33% |
| Pampojilá Peña Flor | GT-SO | 3 | 2 | 33% |
| Piedras de Kab'tzin, San Juan Ixcoy | GT-HU | 3 | 2 | 33% |
| Santa María de Ocuilán | MX-MEX | 3 | 2 | 33% |
| Área de Conservación Ecológica de San Miguel del Progreso | MX-GRO | 3 | 3 | 0% |
| Finca Asturias | GT-QZ; GT-SU; GT-RE | 3 | 3 | 0% |
| La Rosita | GT-QZ | 3 | 3 | 0% |
| Finca Chirijuyú | GT-CM | 2 | 0 | 100% |
| Karnac | GT-BV | 2 | 0 | 100% |
| Reserva Biótica Gertrude Duby | MX-CHP | 2 | 0 | 100% |
| Área de Conservación de San Rafael Agua Pescadito | MX-OAX | 2 | 0 | 100% |
| Bella Vista | HN-IN | 2 | 0 | 100% |
| El Borbollón, La Pandura y La Yerbabuena | MX-GRO | 2 | 0 | 100% |
| Semuc Champey | GT-AV | 2 | 0 | 100% |
| Astillero Municipal El Grande y Astillero Municipal Quiaquichum | GT-SM | 2 | 1 | 50% |
| Bosque de Arce | Jalisco | 2 | 1 | 50% |
| Cerro Agua Platanar | MX-OAX | 2 | 1 | 50% |
| Cerro Guabule | NI-MT | 2 | 1 | 50% |
| El Ocotalito, El Venadario y La Antena | MX-GRO | 2 | 1 | 50% |
| El Retiro | GT-CM | 2 | 1 | 50% |
| Finca Monte Carlo | MX-OAX | 2 | 1 | 50% |
| Finca Patrocinio | GT-QZ | 2 | 1 | 50% |
| Golden Stream Corridor Preserve | BZ-TOL | 2 | 1 | 50% |
| Los Olivos | MX-GRO | 2 | 1 | 50% |
| Santuario del Agua y Forestal Subcuenca Tributaria Presa Antonio Alzate | MX-MEX | 2 | 1 | 50% |
| Serranías de Dipilto - Jalapa | NI-NS | 2 | 1 | 50% |
| Sistema Estuarino Puerto Arista | MX-CHP | 2 | 1 | 50% |
| Volcán de San Vicente | SV-SV | 2 | 1 | 50% |
| Cerro del Baúl | GT-QZ | 2 | 1 | 50% |
| Cerro Papa'a | GT-SO | 2 | 1 | 50% |
| Chusita | GT-SU | 2 | 1 | 50% |
| El Pacaño | GT-CM | 2 | 1 | 50% |
| Häk Yahx Luúm | GT-HU | 2 | 1 | 50% |
| Pachuj | GT-SO | 2 | 1 | 50% |
| Parque Regional Municipal Twi A´lj Witz | GT-HU | 2 | 1 | 50% |
| Área Comunitaria de Conservación Buenos Aires | MX-OAX | 2 | 2 | 0% |
| C.A.D.N.R. 026 Bajo Río San Juan | MX-NLE | 2 | 2 | 0% |
| Cataljí­ o Sacataljí­ | GT-AV | 2 | 2 | 0% |
| Manila | GT-SM | 2 | 2 | 0% |
| Volcán Cruz Quemada | GT-SR | 2 | 2 | 0% |
| Área de Conservación Ecológica de Totomixtlahuaca | MX-GRO | 1 | 0 | 100% |
| Astillero Municipal Sumpango, El Rejón, Chirres y Los Encuentros | GT-SA | 1 | 0 | 100% |
| Bosques de Coníferas Chanal | MX-CHP | 1 | 0 | 100% |
| Calapa | MX-PUE | 1 | 0 | 100% |
| Cerro La Galaxia | MX-VER | 1 | 0 | 100% |
| Cerro Macuiltépetl | MX-VER | 1 | 0 | 100% |
| Cerro Mano de León (Cerro Sija) | GT-QZ | 1 | 0 | 100% |
| Chicacnab | GT-AV | 1 | 0 | 100% |
| Concepción Chuitó | GT-CM | 1 | 0 | 100% |
| Cumbre Laguna Seca | GT-BV | 1 | 0 | 100% |
| El Aguacatillo | MX-HID | 1 | 0 | 100% |
| El Anexo del Capuccino | GT-AV | 1 | 0 | 100% |
| El Caracol, Los Espinos, Mirasol y Tizate | GT-QZ | 1 | 0 | 100% |
| El Porvenir | GT-SO | 1 | 0 | 100% |
| El Recreo | MX-CHP | 1 | 0 | 100% |
| El Roble | GT-PR | 1 | 0 | 100% |
| Francisco Javier Clavijero | MX-VER | 1 | 0 | 100% |
| Huanacastle | MX-OAX | 1 | 0 | 100% |
| Humedales de Montaña María Eugenia | MX-CHP | 1 | 0 | 100% |
| La Florida | GT-QZ | 1 | 0 | 100% |
| La Martinica | MX-VER | 1 | 0 | 100% |
| La Montañita | GT-HU | 1 | 0 | 100% |
| Laguna de Las Ninfas | SV-AH | 1 | 0 | 100% |
| Los Laureles | GT-CM | 1 | 0 | 100% |
| Rancho Santa Elena | MX-HID | 1 | 0 | 100% |
| Santa Catalina y Anexo Joya Carbonera | GT-SA | 1 | 0 | 100% |
| Sistema Lagunar Alvarado | MX-VER | 1 | 0 | 100% |
| Zona de Reserva Ecológica El Fortín, Cruz Blanca y Cerro del Crestón | MX-OAX | 1 | 0 | 100% |
| Área de Conservación de la Ribera de Cajonos del Ejido Plan Mata de Caña | MX-OAX | 1 | 0 | 100% |
| Barranca Honda | MX-CHP | 1 | 0 | 100% |
| Cráter del Volcán de San Salvador | SV-LI | 1 | 0 | 100% |
| El Tejar Garnica | MX-VER | 1 | 0 | 100% |
| Finca Comunitaria Magnolia Miramar | GT-QZ | 1 | 0 | 100% |
| Juan Diego II | MX-OAX | 1 | 0 | 100% |
| Laguna Verde | SV-AH | 1 | 0 | 100% |
| Los Castaños | GT-SU | 1 | 0 | 100% |
| Montebello | GT-BV | 1 | 0 | 100% |
| Parque Lineal Quetzalapan - Sedeño | MX-VER | 1 | 0 | 100% |
| San Bernabé de Ocotepec | MX-CMX | 1 | 0 | 100% |
| San Francisco El Triunfo | SV-SO | 1 | 0 | 100% |
| San Rafael Pie de la Cuesta | GT-SM | 1 | 0 | 100% |
| Tlatucapa | MX-MX | 1 | 0 | 100% |
| Xetaj | GT-HU | 1 | 0 | 100% |
| Astillero Municipal Santa Catarina Barahona | GT-SA | 1 | 1 | 0% |
| Astilleros La Cumbre, El Jute y El Platanar | GT-SA | 1 | 1 | 0% |
| Cafetal Soconusco | MX-OAX | 1 | 1 | 0% |
| Cerro Ajaw | GT-SO | 1 | 1 | 0% |
| Cerro del Algodón | MX-VER | 1 | 1 | 0% |
| Chagüite | GT-SR | 1 | 1 | 0% |
| Chuya | GT-SA | 1 | 1 | 0% |
| Concepción Vista Hermosa | MX-OAX | 1 | 1 | 0% |
| Ecológico de Uruapan | MX-MIC | 1 | 1 | 0% |
| El Barretal | GT-ES | 1 | 1 | 0% |
| El Encanto de Tecpan | GT-CM | 1 | 1 | 0% |
| El Jordan | MX-OAX | 1 | 1 | 0% |
| Finca La Bohemia | GT-QZ | 1 | 1 | 0% |
| Gertrude Duby | MX-CHP | 1 | 1 | 0% |
| Huitepec - Los Alcanfores | MX-CHP | 1 | 1 | 0% |
| Iximchié | GT-CM | 1 | 1 | 0% |
| Las Nieves | SV-US | 1 | 1 | 0% |
| Parque Otomí-Mexica | MX-MX | 1 | 1 | 0% |
| Pataxte | GT-IZ | 1 | 1 | 0% |
| Posada Montaña del Quetzal | GT-BV | 1 | 1 | 0% |
| Reserva de la Biosfera El Cielo | MX-TAM | 1 | 1 | 0% |
| San Diego | GT-ES | 1 | 1 | 0% |


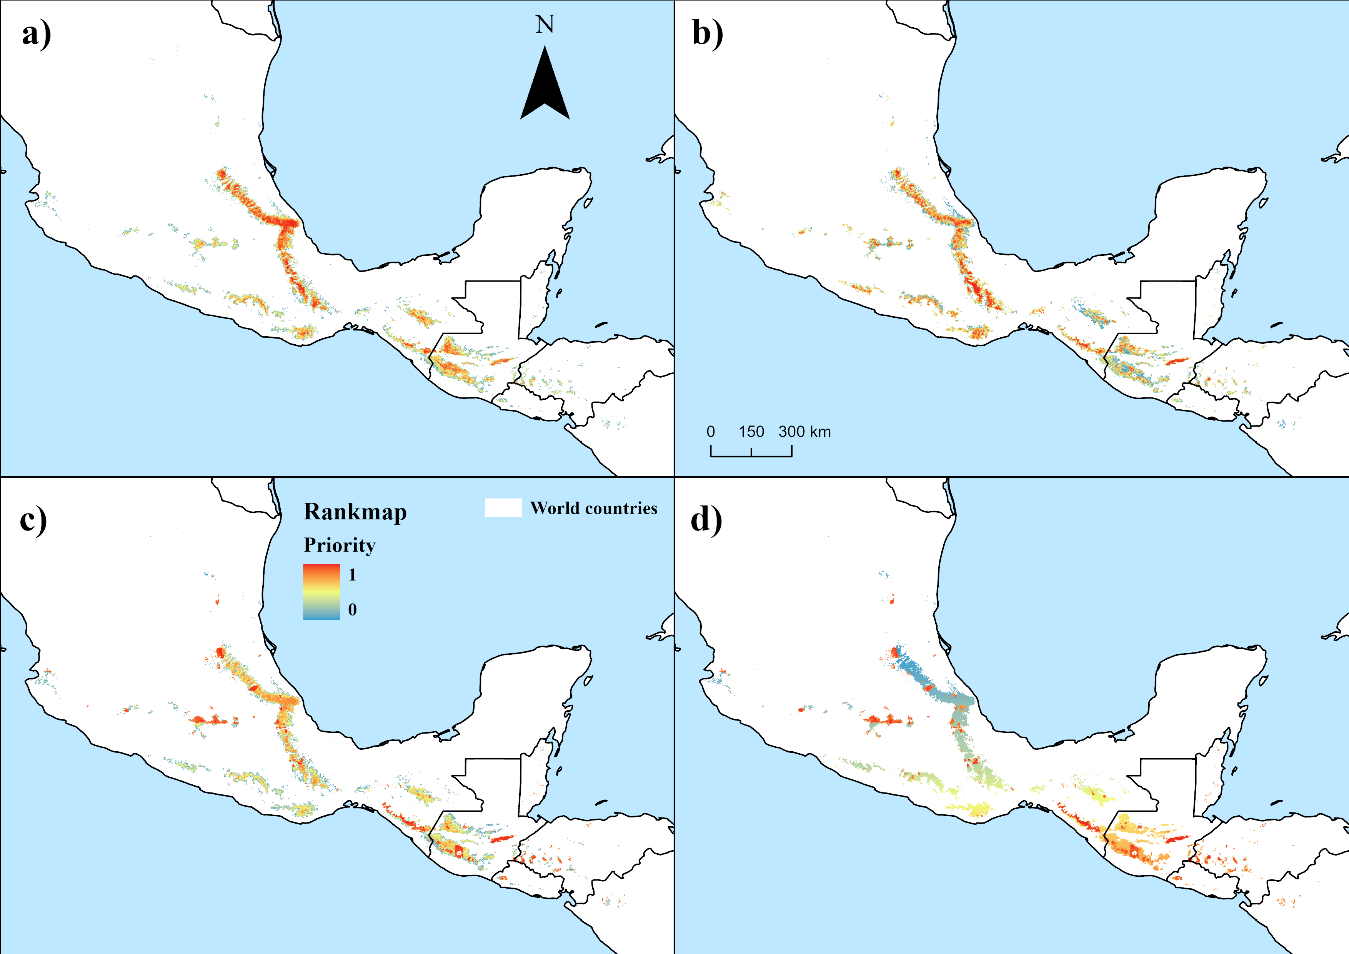


Supplementary figure 1. Comparative spatial outcomes of conservation prioritization using four zonation parametrizations: a) Species-Only, b) Conditioned Feature, c) Conditioned Part Plus Existing Protected Areas, and d) Connectivity.
